# Supplementary material for: Efficient Compression of Encoder-Decoder Models for Semantic Segmentation Using the Separation Index
Source: Research Square preprint supplement (doi:10.21203/rs.3.rs-5231146/v1), 2024-11-28
Supplement: Supplementary file 1 [file eee9b441960429875547338d.docx]

**Data availability**

All datasets used in our paper are available in the Kaggle repository, and further inquiries can be made to the corresponding author on reasonable request. The datasets include:

- CamVid Dataset [1]
- KiTS19 Dataset [2]
- Nuclei Segmentation Dataset [3]

[1] G. J. Brostow, J. Fauqueur, and R. Cipolla, "Semantic object classes in video: A high-definition ground truth database," Pattern recognition letters, vol. 30, no. 2, pp. 88-97, 2009.

[2] N. Heller *et al.*, "The kits19 challenge data: 300 kidney tumor cases with clinical context, ct semantic segmentations, and surgical outcomes," *arXiv preprint arXiv:1904.00445,* 2019.

[3] J. C. Caicedo *et al.*, "Nucleus segmentation across imaging experiments: the 2018 Data Science Bowl," *Nature methods,* vol. 16, no. 12, pp. 1247-1253, 2019.
